# Supplementary material for: Eco-Bio-Social Determinants for House Infestation by Non-domiciliated Triatoma dimidiata in the Yucatan Peninsula, Mexico
Source: PLoS Negl Trop Dis. 2013 Sep 26;7(9):e2466. doi: 10.1371/journal.pntd.0002466 (PMC3784500; doi:10.1371/journal.pntd.0002466)
Supplement: Table S1 — List of studied variables. (XLSX) [file pntd.0002466.s001.xlsx]

## Sheet: Sheet1
HOUSE CHARACTERISTICS AND ENVIRONMENT
Infestation status (Yes/No)
Latitude
Longitude
Distance to surrounding bushes (meters)
Distance to closest public light (meters)
Number of years the house had been built
Number of rooms
Number of bedrooms
Source of cooking heat (fire, has stove, electric stove, other)
Source of water for bathroom
Presence of running water (Yes/No)
Presence of blender (Yes/No)
Presence of electric iron (Yes/No)
Number of TV sets
Presence of firewood inside the house (Yes/No)
Presence og gravel inside the house (Yes/No)
Presence of sand/cement bags inside the house (Yes/No)
Presence of construction bricks inside the house (Yes/No)
Presence of rock piles inside the house (Yes/No)
Presence of corn or other grain inside the house (Yes/No)
FOR EACH ROOM OF THE HOUSE (On average 2 rooms/house)
Materials of walls
Plastering of walls
Materials and type of roof
Materials and type of floor
Number of windows
Number of windows with insect screens
Number of windows with curtains
PERIDOMICILE CHARACTERISTICS
Length of peridomicile
Width of peridomicile
Surface of peridomicile
Material of peridomicile enclosure
Presence of firewood <10m from house (Yes/No)
Presence of gravel <10m from house (Yes/No)
Presence of sand/cement bags <10m from house (Yes/No)
Presence of construction bricks/blocks <10m from house (Yes/No)
Presence of rock piles <10m from house (Yes/No)
Presence of corn or other grain <10m from house (Yes/No)
Presence of thatched roof <10m from house (Yes/No)
Presence of storage room <10m from house (Yes/No)
Density of vegetation <10m from house (High, medium, low)
Presence of trash <10m from house (Yes/No)
Presence of firewood >10m from house (Yes/No)
Presence of gravel >10m from house (Yes/No)
Presence of sand/cement bags >10m from house (Yes/No)
Presence of construction bricks/blocks >10m from house (Yes/No)
Presence of rock piles >10m from house (Yes/No)
Presence of corn or other grain >10m from house (Yes/No)
Presence of thatched roof >10m from house (Yes/No)
Presence of storage room >10m from house (Yes/No)
Density of vegetation >10m from house (High, medium, low)
Presence of trash >10m from house (Yes/No)
Cleaning of peridomicile includes cutting grass (Yes/No)
Cleaning of peridomicile includes collecting trash (Yes/No)
Cleaning of peridomicile includes sweeping (Yes/No)
Cleaning of peridomicile includes burning trash (Yes/No)
Cleaning of peridomicile includes something else (specify)
Time since last cleaning of the peridomicile (Days or weeks)
Presence of light in the peridomicile at night (Yes/No)
Presence of domestic animals (Yes/No)
FOR EACH DOMESTIC ANIMAL SPECIES, INCLUDING: DOGS, CATS; CHICKENS; RABBITS; PIGS; PERCHING BIRDS; AND OTHERS (SPECIFY)
Presence of [i.e. Dogs] (Yes/No)
Number of [dogs]
Persistence of [dogs] in the family (New, seasonal, all year round)
Location of [dogs] (No dog, free ranging, tied/enclosed)
Freedom of [dogs]
Presence of [dog] corral/cage/enclosure (Yes/No)
Material of the floor of the animal corral/cage/enclosure
Time since last cleaning of animal corral/cage/enclosure
SOCIODEMOGRAPHICS AND COMMON PRACTICES
Number of inhabitants
Gender of head of the household
Number of men
Number of women
Number of children
Profesion of head of the household
Number of persons in the household who have a work contract
Socioeconomic index
Years of school attended by head of household
School education level reached by head of household
Head of household speaks spanish (Yes/No)
Head of household speaks mayan (Yes/No)
Years of school attended by spouse of head of household
School education level reached by spouse of head of household
Spouse speaks spanish (Yes/No)
Spouse speaks mayan (Yes/No)
Someone from the household receives social benefits from "Oportunidades" (Yes/No)
Use insecticide coils (Yes/No)
Use plug-in insecticide (Yes/No)
Use insecticide spray cans (Yes/No)
Use insecticide inside the house (Yes/No)
Use insecticide in the peridomicile (Yes/No)
Use insect repellents (Yes/No)
Use mosquito nets (Yes/No)
Use profesional insecticide spraying (Yes/No)
Use herbicide (Yes/No)
Health authorities come to fumigate (Yes/No)
Health authorities come to remove mosquito breeding sites (Yes/No)
Person who last cleaned the peridomicile
Someone from the family is sleeping away from the village (Yes/No)
Someone from the family sleeps outside the house (Yes/No)
Use municipal trash recollection system (Yes/No)
Someone from the family takes the trash to municipal facility (Yes/No)
Thrash is burned in the peridomicile (Yes/No)
Trash is thrown in the peridomicile (Yes/No)
Trash is thrown in some other place (Yes/No)
Have seen triatomine inside the house (Yes/No)
Have taken a triatomine to the health center (Yes/No)
